# Supplementary material for: Downregulation of Plasma miR-215 in Chronic Myeloid Leukemia Patients with Successful Discontinuation of Imatinib
Source: Int J Mol Sci. 2016 Apr 15;17(4):570. doi: 10.3390/ijms17040570 (PMC4849026; doi:10.3390/ijms17040570)
Supplement: Supplementary file 1 [file ijms-17-00570-s001.xlsx]

## Sheet: Table S1
	Table S1
	Plasma miRNA profile by TaqMan low-density array between 3 STOP-IM and 3 healthy subjects using R software-T test
			STIM_deltaCt			NC_deltaCt
	Rank	Detector	STOP-IM 1	STOP-IM 2	STOP-IM 3	Control no. 1	Control no. 2	Control no. 3	p value
	1	hsa-miR-32-4395220	11.032	10.9464	11.0359	18.0311	16.0224	17.0253	0.000487943
	2	hsa-miR-215-4373084	16.0389	15.0154	16.0204	8.09238	3.98699	8.08076	0.00310928
	3	hsa-miR-744-4395435	16.0389	15.0154	16.0204	8.99669	12.0251	12.0088	0.0116196
	4	hsa-miR-576-3p-4395462	16.0389	15.0154	16.0204	14.0265	11.987	12.9833	0.016598
	5	hsa-miR-410-4378093	16.0389	15.0154	16.0204	14.0462	12.0042	12.9984	0.0170096
	6	hsa-miR-122-4395356	3.02364	3.99143	4.98821	8.01999	6.97705	6.04221	0.020089
	7	hsa-miR-328-4373049	10.0542	11.9978	12.0525	8.01868	9.00116	8.99791	0.0213471
	8	hsa-miR-146b-3p-4395472	16.0389	15.0154	16.0204	13.9763	12.0105	11.0351	0.0225923
	9	hsa-miR-484-4381032	8.00503	9.01828	10.0384	7.01465	6.99581	7.0147	0.0265878
	10	hsa-miR-202-4395474	12.0786	15.0154	11.0008	18.0311	16.0224	17.0253	0.0314268
	11	hsa-miR-150-4373127	2.03218	3.97794	4.99264	-0.996426	0.972334	0.968473	0.0368982
	STOP-IM, stop imatinib mesylate chronic myeloid leukemia patients (STIM).
	Control, healthy subjects (NC).

## Sheet: Table S2
	Table S2
	Exosomal miRNA profile by TaqMan low-density array between 3 STOP-IM and 3 healthy subjects using R software-T test	STIM_deltaCt			NC_deltaCt
			STIM_deltaCt	STOP-IM 3	Control no. 1	NC_deltaCt	Control no. 3	p value
	Rank	Detector	STOP-IM 1	STOP-IM 2	STOP-IM 3	Control no. 1	Control no. 2	Control no. 3	p value
	1	hsa-miR-25-4373071	5.00318	4.98649	5.01505	3.9821	4.01138	3.99649	1.15355e-07
	2	hsa-let-7a-4373169	14.038	15.02	16.0442	2.03041	4.05683	4.0695	0.000197971
	3	hsa-miR-215-4373084	14.038	15.02	16.0442	7.01409	8.03359	8.02095	0.000394528
	4	hsa-miR-495-4381078	14.038	15.02	16.0442	4.99876	5.04657	7.06846	0.000478052
	5	hsa-miR-193a-5p-4395392	10.0209	9.06748	9.06635	7.00446	7.02036	7.02143	0.00173362
	6	hsa-miR-125b-4373148	14.038	15.02	16.0442	11.0069	10.0202	11.0394	0.00289545
	7	hsa-miR-128-4395327	14.038	15.02	16.0442	11.0069	9.01726	10.0017	0.00352309
	8	hsa-miR-579-4395509	14.038	15.02	16.0442	11.0069	11.0725	11.9917	0.00510574
	9	hsa-miR-576-3p-4395462	14.038	15.02	16.0442	11.0069	11.0312	12.0111	0.00524583
	10	hsa-miR-99b-4373007	10.0318	11.0382	11.0231	6.01414	6.00376	8.01696	0.0057821
	11	hsa-miR-122-4395356	3.02301	3.00266	3.00445	4.98649	3.99533	5.02749	0.00794159
	12	hsa-miR-382-4373019	14.038	15.02	16.0442	11.0069	7.01462	7.0832	0.00983852
	13	hsa-miR-484-4381032	4.00012	4.991	5.00797	-0.0431023	1.99204	1.99397	0.0113905
	14	hsa-miR-148b-4373129	14.038	15.02	11.0478	5.98091	8.01489	7.97899	0.0116056
	15	hsa-miR-671-3p-4395433	14.038	15.02	16.0442	5.97033	10.0088	9.99693	0.0121019
	16	hsa-miR-889-4395313	14.038	15.02	16.0442	11.0069	9.03727	11.9834	0.0138986
	17	hsa-miR-21-4373090	4.13972	3.97771	5.01949	-0.0351028	1.96817	1.99756	0.014723
	18	hsa-miR-146a-4373132	1.9977	4.99512	4.00767	-2.0299	-0.0287075	0.00206375	0.0171767
	19	hsa-miR-491-5p-4381053	14.038	15.02	16.0442	4.98802	8.00118	11.0229	0.0186307
	20	hsa-miR-130a-4373145	7.0424	8.00934	9.02949	3.97544	6.03291	5.0358	0.0218163
	21	hsa-miR-301a-4373064	9.03083	9.01312	11.0165	3.96707	5.99652	6.988	0.0220472
	22	hsa-miR-29a-4395223	8.00084	9.99114	10.0157	6.98587	6.00011	6.9958	0.0229205
	23	hsa-miR-150-4373127	3.01467	3.98579	2.99397	-0.0412674	2.00737	0.974787	0.0253823
	24	hsa-miR-92a-4395169	3.01966	1.99489	2.02381	-1.00777	1.03074	-0.0090332	0.0259836
	25	hsa-miR-19b-4373098	0.987875	2.06005	1.0407	-1.02744	0.0263653	0.0016365	0.0261629
	26	hsa-miR-27b-4373068	14.038	11.0069	9.02186	2.97554	4.99921	7.00979	0.0270764
	27	hsa-miR-24-4373072	2.01543	3.98035	4.02114	-2.0088	0.0113525	1.02004	0.0298467
	28	hsa-miR-532-5p-4380928	14.038	11.0505	12.0321	6.96369	10.0333	8.01911	0.0327047
	29	hsa-miR-335-4373045	6.99913	8.96107	10.0482	2.98915	4.99729	6.00162	0.0332989
	30	hsa-miR-328-4373049	7.05496	11.0123	10.0482	2.97838	6.01976	5.01663	0.0343627
	31	hsa-miR-652-4395463	10.0122	15.02	12.019	6.99182	8.03432	7.98949	0.0351584
	32	hsa-miR-146b-5p-4373178	6.02106	6.99364	7.02222	2.99038	5.01679	5.00243	0.0353038
	33	hsa-miR-181a-4373117	7.95805	8.02902	9.00348	2.99275	6.05209	6.07543	0.0379338
	34	hsa-miR-142-5p-4395359	14.038	15.02	10.0312	8.01955	8.00508	9.0084	0.0399217
	35	hsa-miR-223-4395406	-0.988543	3.03914	1.02311	-5.0319	-2.99714	-2.01782	0.0403469
	STOP-IM, stop imatinib mesylate chronic myeloid leukemia patients (STIM).
	Control, healthy subjects (NC).

## Sheet: Table S3
	Table S3
	A functional annotation analysis using DAVID Bioinformatics tools for the target genes of miR-215
	Category	Term	List total	Count	%	p value	Genes	Benjamini
	GO:0044237	Cellular metabolic process	576	194	27.6748	9.52539e-06	IL6ST, MED22, MED21, MXI1, RAB1A, ZNF776, PHTF2, ZNF248, RAB23, PHTF1, ZNF45, PIM1, SPAG9, MAD2L1, PRDM4, MAPK9, EIF2AK3, ZNHIT3, DEAF1, ZNF519, ZNF611, HOXA13, TFCP2L1, PTPLAD1, TAF9B, ZNF230, HESX1, ZNF226, HOXA10, FBXO5, FBXO4, BCOR, PLAGL2, NKRF, TCF7, KLF10, CDC20, PMF1, ZNF215, RNF6, RAD54B, ZNF114, ZBTB33, HNF1B, TRPV1, PPARG, ZEB2, C10ORF137, CCNE1, NOD2, MYB, GATAD1, FGF2, NFKBIZ, ZFP30,…	0.000967598
	GO:0007049	Cell cycle	576	93	13.2668	3.58588e-21	GAS2L3, KIF23, KIFC1, CLSPN, NBN, DBF4B, CDC14A, E2F8, TTK, CUZD1, FAM83D, CCNE1, NDE1, CUL5, RAD21, CDKN2A, CDKN2D, PSMC3IP, PSMD6, ASPM, DHCR24, CDC7, DSN1, SGOL2, KIF15, PIM1, PAPD7, RB1, MCM3, PPP1CB, MCM6, RAD51, RAD1, PPP1CA, MAD2L1, BUB1B, NEK9, MDM4, DST, ZMYND11, HAUS3, PPP2R3B, BLM, LIN9, LRRCC1, ANLN, ANAPC10, CEP55, ITGB1, NCAPH, HSPA2, MACF1, SMARCB1, CENPA, MDC1, HJURP, BCL2, FBXO5,…	9.83967e-18
	GO:0051716	Cellular response to stimulus	576	65	9.27247	3.61117e-07	CYP24A1, CLSPN, NBN, ZMAT3, DICER1, PPARG, UVRAG, RPS6KB1, CUZD1, FOS, CCNE1, RAD21, CDKN2D, INSIG1, CCNO, DTL, GEN1, USP1, NEIL3, PAPD7, CCDC47, TOPBP1, IL6R, PPP1CB, RAD51, RAD1, RECQL, RFC4, AS3MT, MAPK9, EIF2AK3, ATG10, BLM, XIAP, PTPLAD1, UNG, BMPR2, UBE2V2, IGF1R, TYMS, MDC1, BCL2, CKLF, PCSK9, ERCC3, FEN1, APC, TRIP13, MSH6, KAT2B, NCEH1, FADS1, EME1, BRIP1, BRCA2, ATAD5, APPL1, SIRT1, BRC…	5.50487e-05
	GO:0007067	Mitosis	576	36	5.13552	3.76228e-12	KIF23, HAUS3, KIFC1, LRRCC1, ANAPC10, ANLN, CEP55, FAM83D, NDE1, NCAPH, RAD21, FBXO5, PAFAH1B1, SKA1, ASPM, ERCC6L, APC, DSN1, DLGAP5, KIF15, KIF18A, NUF2, PAPD7, CENPF, CENPE, CDC20, PMF1, SMC2, MIS12, SMC4, NEDD1, MAD2L1, KIF20B, BUB1B, NEK9, CIT	1.29048e-09
	GO:0006281	DNA repair	576	33	4.70756	1.85079e-07	CLSPN, NBN, BLM, UNG, UVRAG, UBE2V2, TYMS, RAD21, MDC1, CDKN2D, ERCC3, CCNO, FEN1, TRIP13, MSH6, GEN1, USP1, NEIL3, EME1, PAPD7, BRIP1, BRCA2, TOPBP1, SIRT1, BRCA1, RAD51, RAD1, RECQL, RFC4, TDP1, TDG, RAD54B, BARD1	3.38565e-05
	GO:0000075	Cell cycle checkpoint	576	15	2.1398	1.74801e-05	NBN, BLM, TTK, BRIP1, CENPF, CENPE, RB1, BRCA1, RAD1, CDKN2A, MAD2L1, MDC1, BUB1B, ERCC3, APC	0.00149781
